# Supplementary material
Source: MDPI journal article supplement (https://www.mdpi.com/1424-2818/13/11/590)
Supplement: s1 [file s1]

**Table S1.** Pairwise distances (Tamura-Nei distance) based on 607 bp between COI sequences from two new species.

|                                                   | 1      | 2      | 3      | 4      | 5      | 6      | 7      | 8      | 9      | 10     | 11     | 12     | 13    | 14    |
|---------------------------------------------------|--------|--------|--------|--------|--------|--------|--------|--------|--------|--------|--------|--------|-------|-------|
| 1. <i>L. koreana</i> sp. nov.<br>[OK333374]       |        |        |        |        |        |        |        |        |        |        |        |        |       |       |
| 2. <i>L. koreana</i> sp. nov.<br>[OK333373]       | 0.165  |        |        |        |        |        |        |        |        |        |        |        |       |       |
| 3. <i>L. koreana</i> sp. nov.<br>[OK333372]       | 0.495  | 0.33   |        |        |        |        |        |        |        |        |        |        |       |       |
| 4. <i>L. koreana</i> sp. nov.<br>[OK333371]       | 0.33   | 0.165  | 0.495  |        |        |        |        |        |        |        |        |        |       |       |
| 5. <i>L. koreana</i> sp. nov.<br>[OK333370]       | 0.33   | 0.165  | 0.495  | 0      |        |        |        |        |        |        |        |        |       |       |
| 6. <i>L. koreana</i> sp. nov.<br>[OK333369]       | 1.155  | 0.99   | 0.66   | 1.155  | 1.155  |        |        |        |        |        |        |        |       |       |
| 7. <i>L. koreana</i> sp. nov.<br>[OK333368]       | 0.33   | 0.165  | 0.495  | 0      | 0      | 1.155  |        |        |        |        |        |        |       |       |
| 8. <i>L. koreana</i> sp. nov.<br>[OK333367]       | 1.155  | 0.99   | 0.66   | 1.155  | 1.155  | 0.66   | 1.155  |        |        |        |        |        |       |       |
| 9. <i>L. koreana</i> sp. nov.<br>[OK333366]       | 0.165  | 0      | 0.33   | 0.165  | 0.165  | 0.99   | 0.165  | 0.99   |        |        |        |        |       |       |
| 10. <i>L. koreana</i> sp. nov.<br>[OK333365]      | 0.33   | 0.165  | 0.495  | 0      | 0      | 1.155  | 0      | 1.155  | 0.165  |        |        |        |       |       |
| 11. <i>L. koreana</i> sp. nov.<br>[OK333364]      | 0.165  | 0      | 0.33   | 0.165  | 0.165  | 0.99   | 0.165  | 0.99   | 0      | 0.165  |        |        |       |       |
| 12. <i>L. koreana</i> sp. nov.<br>[OK333363]      | 0.495  | 0.33   | 0      | 0.495  | 0.495  | 0.66   | 0.495  | 0.66   | 0.33   | 0.495  | 0.33   |        |       |       |
| 13. <i>L. ulleungensis</i> sp. nov.<br>[OK333377] | 22.937 | 22.772 | 22.772 | 22.937 | 22.937 | 22.772 | 22.937 | 22.772 | 22.772 | 22.937 | 22.772 | 22.772 |       |       |
| 14. <i>L. ulleungensis</i> sp. nov.<br>[OK333376] | 22.69  | 22.525 | 22.525 | 22.69  | 22.69  | 22.525 | 22.69  | 22.525 | 22.525 | 22.69  | 22.525 | 22.525 | 0.413 |       |
| 15. <i>L. ulleungensis</i> sp. nov.<br>[OK333375] | 23.102 | 22.937 | 22.937 | 23.102 | 23.102 | 22.937 | 23.102 | 22.937 | 22.937 | 23.102 | 22.937 | 22.937 | 0.495 | 0.578 |

**Table S2.** Pairwise distances (Tamura-Nei distance) based on 1,736 bp between 18SrRNA sequences from two new species.

[illegible]

**Table S3.** Pairwise distances (Tamura-Nei distance) based on 583 bp between COI sequences from genus *Longipedia*.

|                                              | 1      | 2      | 3      | 4      | 5      | 6      | 7      | 8     |
|----------------------------------------------|--------|--------|--------|--------|--------|--------|--------|-------|
| 1. <i>Longipedia coronate</i> [MH976648]     |        |        |        |        |        |        |        |       |
| 2. <i>Longipedia coronate</i> [MH976649]     | 0.859  |        |        |        |        |        |        |       |
| 3. <i>Longipedia kikuchii</i> [KR049012]     | 21.478 | 21.478 |        |        |        |        |        |       |
| 4. <i>Longipedia</i> sp. [MF077892]          | 18.729 | 18.729 | 22.337 |        |        |        |        |       |
| 5. <i>Longipedia</i> sp. [MF077907]          | 26.758 | 27.101 | 30.875 | 25.729 |        |        |        |       |
| 6. <i>Longipedia koreana</i> [OK333372]      | 21.821 | 21.821 | 20.619 | 23.54  | 28.816 |        |        |       |
| 7. <i>Longipedia koreana</i> [OK333364]      | 21.649 | 21.649 | 20.619 | 23.368 | 28.988 | 0.344  |        |       |
| 8. <i>Longipedia ulleungensis</i> [OK333377] | 19.416 | 19.759 | 25.430 | 19.416 | 28.988 | 22.852 | 22.852 |       |
| 9. <i>Longipedia ulleungensis</i> [OK333376] | 19.330 | 19.502 | 25.687 | 19.33  | 29.074 | 22.595 | 22.595 | 0.430 |
